# Supplementary material for: Miocene Antarctic Ice Sheet area adapts significantly faster than volume to CO 2 -induced climate change
Source: Copernicus journal article supplement (doi:10.5194/cp-20-257-2024), 2024-01-30
Supplement: Supplementary file 1 [file cp-20-257-2024-supplement.pdf]

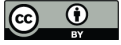

*Supplement of*

## **Miocene Antarctic Ice Sheet area adapts significantly faster than volume to CO<sub>2</sub>-induced climate change**

**Lennert B. Stap et al.**

*Correspondence to:* Lennert B. Stap (l.b.stap@uu.nl)

The copyright of individual parts of the supplement might differ from the article licence.

### A) Volume

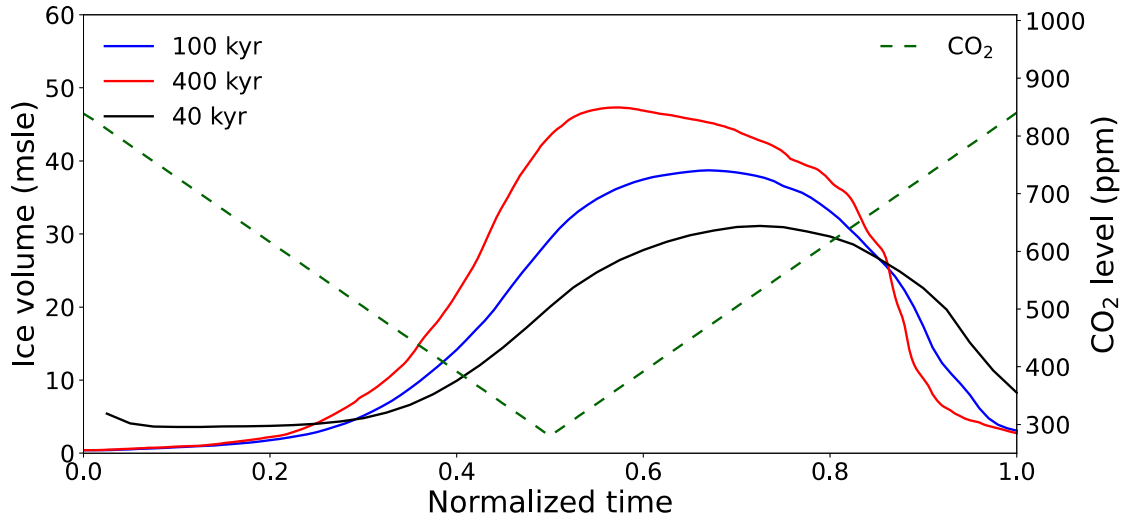

### B) Area

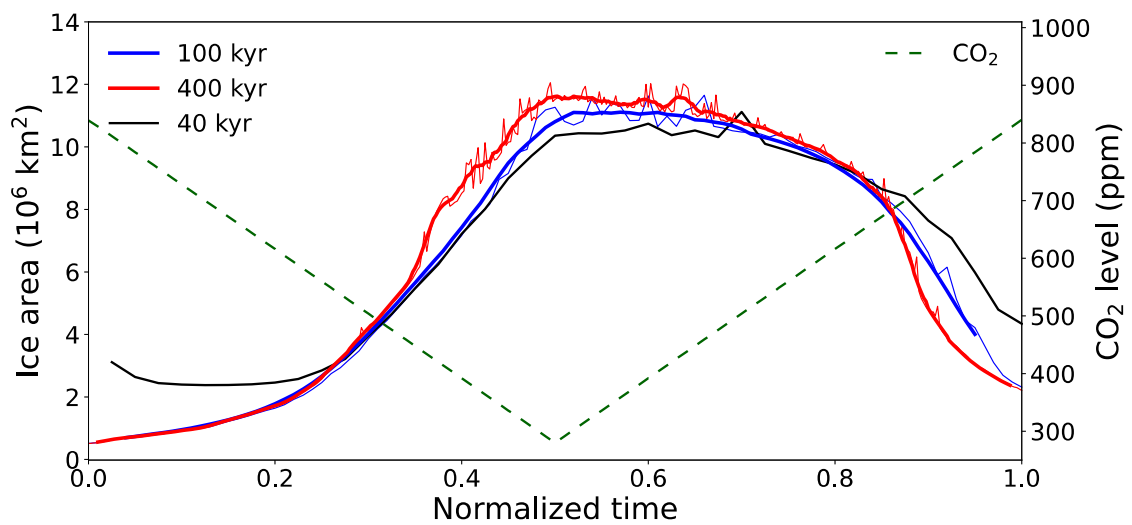

**Figure S1. (A)** Transient evolution of the forcing CO<sub>2</sub> level (green dashed) and the resulting ice volume over time, normalized with respect to the maximum integration time, for the 100-kyr (blue), 400-kyr (red) simulations, and the final cycle of the 40-kyr simulation (black).

**(B)** Same for CO<sub>2</sub> and ice area. For the 100-kyr and 400-kyr simulations, we show the 10-kyr moving average (thick lines) in addition to the 1-kyr output (thin lines).

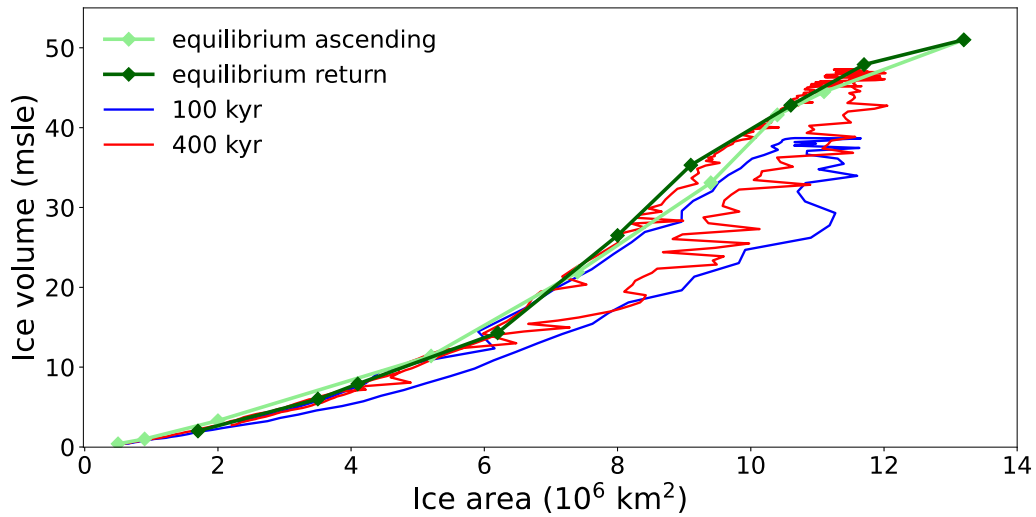

**Figure S2.** Ice volume plotted against ice area, for the 100-kyr (blue) and 400-kyr (red) simulations. The progression direction is counterclockwise. The connected symbols indicate the ascending branch (lightgreen) and return branch (darkgreen) equilibrium ice volume and area.

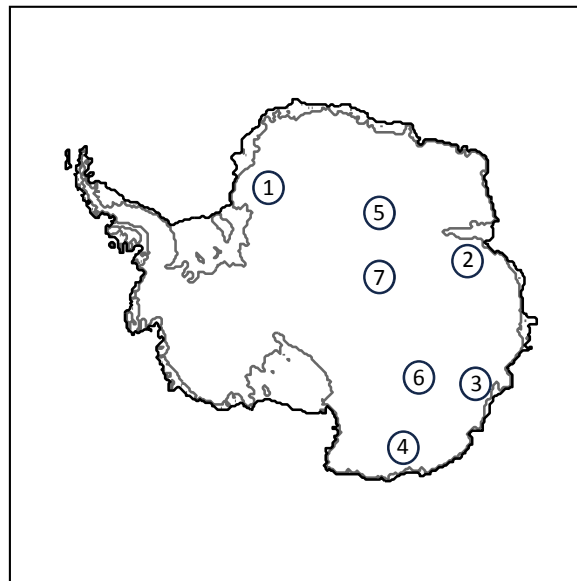

**Figure S3.** Map of present-day Antarctic grounding lines and coastlines (Morlighem et al., 2020). Indicated are the locations where ice sheet collapse occurs in successive order: 1) Coats Land, 2) Princess Elizabeth Land, 3) Wilkes Land, 4) George V Land, 5) Dome Fuji, 6) Dome Circe, and 7) Dome Argus.

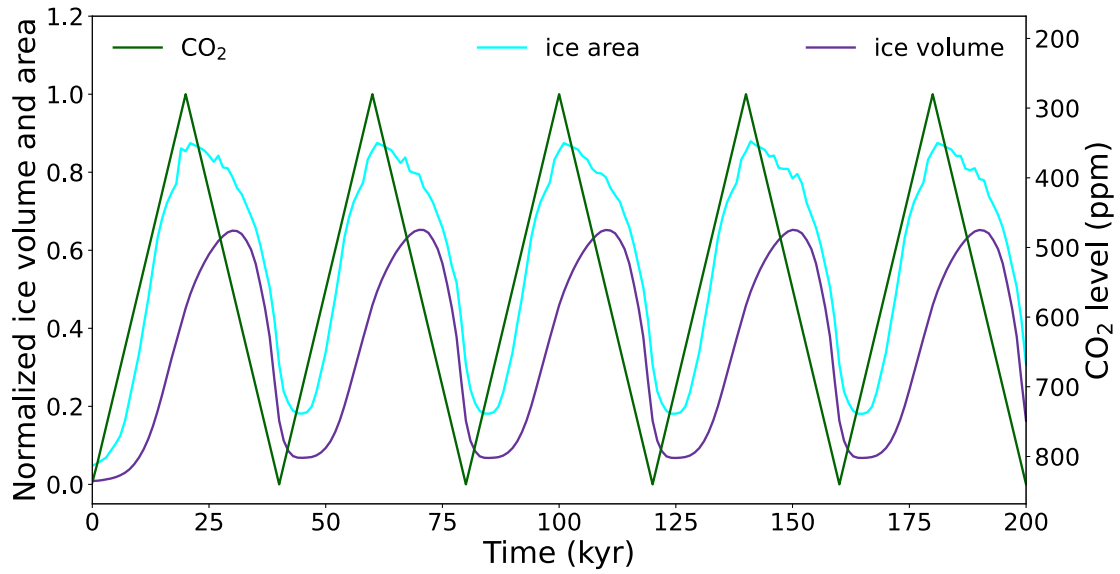

**Figure S4.** Results for the 40-kyr simulation using an index method in which the interpolation of the climate forcing is solely based on the CO<sub>2</sub> level (NOFEEDB experiment in Stap et al., 2022). Transient evolution over time of ice area (cyan) and ice volume (purple) relative to their maximum sizes as obtained from the 280-ppm equilibrium simulation,  $14.4 \times 10^6 \text{ km}^2$  and 60.1 msle respectively. The green line shows the forcing CO<sub>2</sub> level. The right y-axis is reversed because CO<sub>2</sub> is generally negatively related to the benthic  $\delta^{18}\text{O}$  signal.

## Section S1

We perform an additional experiment using a model set-up representative for Pleistocene glacial-interglacial variability of the North American ice sheet, that is described in detail in Scherrenberg et al. (2023). Briefly, we deploy the updated version 2.0 of IMAU-ICE. This version uses the DIVA approach - which is slightly different from the hybrid SIA/SSA approach - to calculate the dynamics of grounded and floating ice (Berends et al., 2022). The grid covers the North American continent on a 40x40-km resolution. We carry out an equilibrium and a transient simulation like those for the Miocene Antarctic ice sheet. An equilibrium simulation is conducted at a CO<sub>2</sub> level of 190 ppm. In the transient simulation, the CO<sub>2</sub> level is linearly decreased from 280 to 190 ppm, and then increased back to 190 ppm. In Fig. S4, we show the forcing CO<sub>2</sub> level and the resulting ice area and volume.

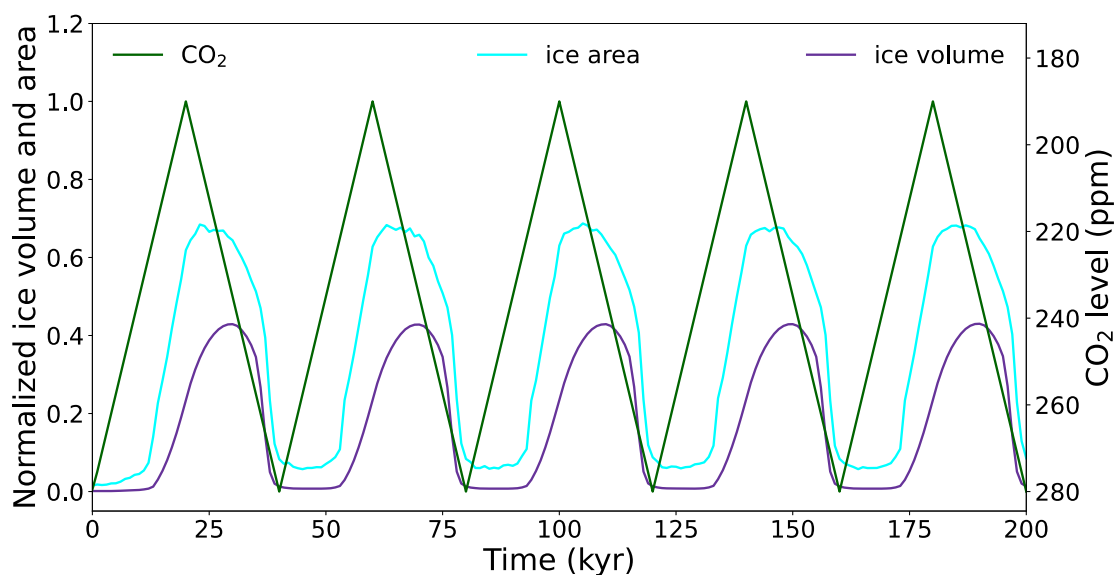

**Figure S5.** Results for the 40-kyr simulation of the North American ice sheet in settings representative for Pleistocene glacial-interglacial variability. Transient evolution over time of ice area (cyan) and ice volume (purple) relative to their maximum sizes as obtained from the 190-ppm equilibrium simulation,  $15.5 \times 10^6$  km<sup>2</sup> and 98.9 msle respectively. The green line shows the forcing CO<sub>2</sub> level. The right y-axis is reversed because CO<sub>2</sub> is generally negatively related to the benthic  $\delta^{18}\text{O}$  signal.

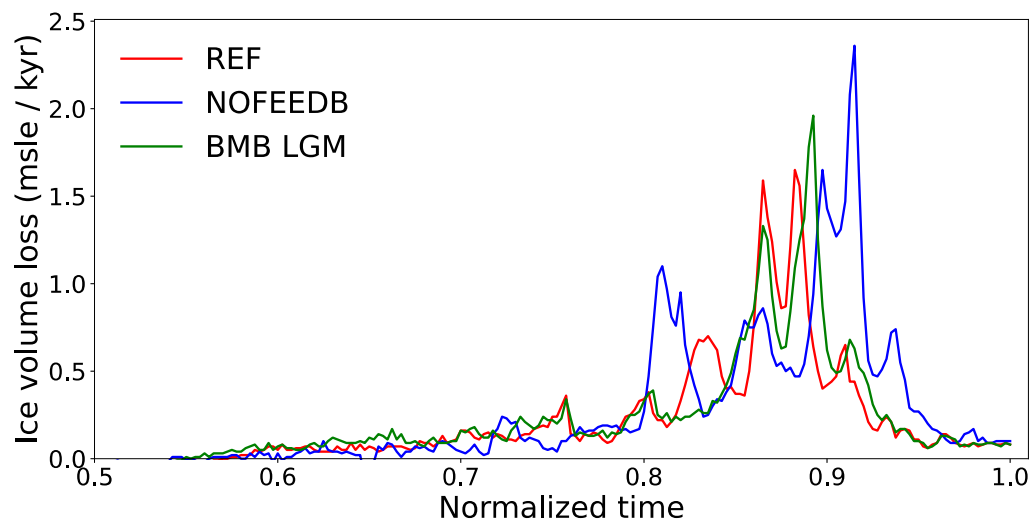

**Figure S6.** Decay rate over normalized time, for the 400-kyr simulations of the reference experiment (red), an experiment using a simpler index method for the climate interpolation (excluding the albedo-temperature feedback; blue), and an experiment using Last Glacial Maximum sub-shelf melt rates (green).

## **REFERENCES**

- Berends, C. J., Goelzer, H., Reerink, T. J., Stap, L. B., and van de Wal, R. S. W.: Benchmarking the vertically integrated ice-sheet model IMAU-ICE (version 2.0), *Geoscientific Model Development*, 15, 5667–5688, <https://doi.org/10.5194/gmd-15-5667-2022>, 2022.
- Morlighem, M., Rignot, E., Binder, T., Blankenship, D., Drews, R., Eagles, G., Eisen, O., Ferraccioli, F., Forsberg, R., Fretwell, P., et al.: Deep glacial troughs and stabilizing ridges unveiled beneath the margins of the Antarctic ice sheet, *Nature Geoscience*, 13, 132–137, <https://doi.org/10.1038/s41561-019-0510-8>, 2020.
- Scherrenberg, M. D. W., Berends, C. J., Stap, L. B., and van de Wal, R. S. W.: Modelling feedbacks between the Northern Hemisphere ice sheets and climate during the last glacial cycle, *Climate of the Past*, 19, 399–418, <https://doi.org/10.5194/cp-19-399-2023>, 2023.
- Stap, L. B., Berends, C. J., Scherrenberg, M. D. W., Van De Wal, R. S. W., and Gasson, E. G. W.: Net effect of ice-sheet–atmosphere interactions reduces simulated transient Miocene Antarctic ice-sheet variability, *The Cryosphere*, 16, 1315–1332, <https://doi.org/10.5194/tc-16-1315-2022>, 2022.
